# Supplementary material
Source: ML conference proceedings conference paper supplement (https://openaccess.thecvf.com/content/CVPR2026/html/Phung_UniVerse_A_Unified_CVPR_2026_paper.html)
Supplement: Supplementary file 1 [file 10431_supp.pdf › 10431_supp/10431_supp.pdf]

# UniVerse: A Unified Modulation Framework for Segmentation-Free, Disentangled Multi-Concept Personalization

## Supplementary Material

### 1. Data Curation

#### 1.1. Initial Dataset and Motivation

Due to the lack of a publicly available dataset specifically designed for multi-subject personalized image generation, we created a new training resource for our UniVerse model. We initiate our pipeline using the public UNO dataset [? ], which originally contains approximately one million image pairs, each consisting of a single-subject reference image and a target image generated by FLUX1.1dev [43]. After filtering for high-quality pairs, we collect around 300K image pairs to serve as the foundation for our training data.

#### 1.2. Multi-Subject Data Curation Pipeline

Inspired by UNO [? ] and XVerse [? ], we perform a reversed data curation pipeline to convert the single-subject foundation into a multi-subject reference dataset, as illustrated in Fig. 2. This pipeline is comprehensive and designed to obtain multi-subject reference images for each target image and its corresponding prompt.

**Entity Extraction and Grounding.** We first extract relevant entities from the prompt using the SpaCy [42] parser, focusing on noun phrases. The OwlV2 [44] model is then used to ground these phrases by predicting bounding boxes within the target image. Abstract phrases associated with low-confidence bounding boxes are filtered out to maintain data quality in the reference set.

**Segmentation and Generation.** With the filtered bounding boxes and phrases, we utilize SAM2 [45] to segment the target objects. This yields the white-background reference images required by the XVerse model [? ]. The input prompt for XVerse is generated by Qwen3 [46].

**Reference Diversity.** We enhance the diversity of the final dataset by combining multiple reference images for a single target image. Specifically, 75% of the generated reference images use a single subject, while the remaining 25% are created with two subjects. The output images of XVerse serve as the final reference images for the corresponding target images.

**Reference Prompt Generation.** To obtain accurate reference prompts describing the generated output, we use the Qwen3VL vision-language model [41].

Ultimately, this process yields a dataset with multiple-subject reference images for each target image, substantially increasing the diversity and quantity necessary for training UniVerse in complex personalization scenarios.

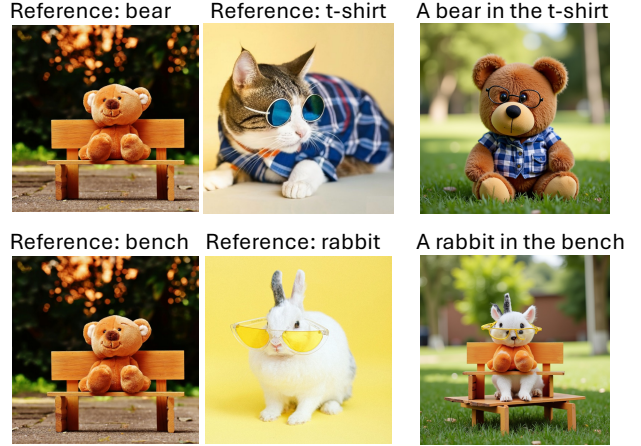

Figure 1. **Failure Cases of UniVerse in Multi-reference Images.** Here, the glasses always appear in the generated images and there is identity mixing between references.

### 2. Additional Qualitative Results

We include more qualitative results across diverse contexts and styles on Dreambench. With given only single-object inputs, our method consistently produces rich and high-quality results while preserving object identity across different contexts and styles. We also provide the `index.html` with more results on our benchmark, model’s application and ablation studies.

### 3. Limitation and Future work

#### 3.1. Additional quantitative result

In Table 1, UniVerse achieves competitive performance, showing results that are largely consistent with other strong baselines in single-subject generation.

#### 3.2. Limitations

Our proposed approach, while effective, still presents several limitations:

**Benchmark Insufficiency.** The field currently lacks a comprehensive, segmentation-free benchmark tailored for multi-reference generation. The absence of a more extensive benchmark—particularly one featuring richer reference sets (*e.g.*, three or more distinct concepts, each with multiple attributes), hinders rigorous, standardized evaluation and comparison.

**Concept Interference.** The model is not entirely resilient

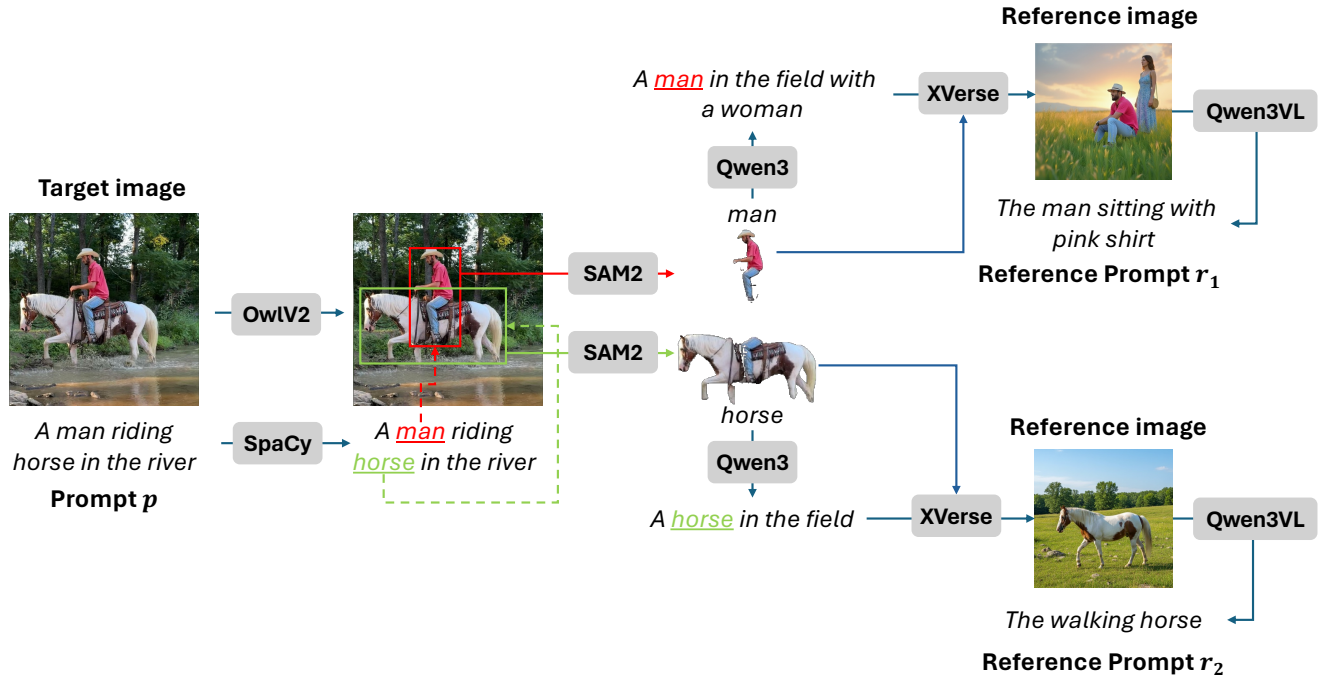

Figure 2. **Data Curation for Cross-Reference Images.** From the image with many objects, we extract each entity and adopt XVerse to generate reference images in different context.

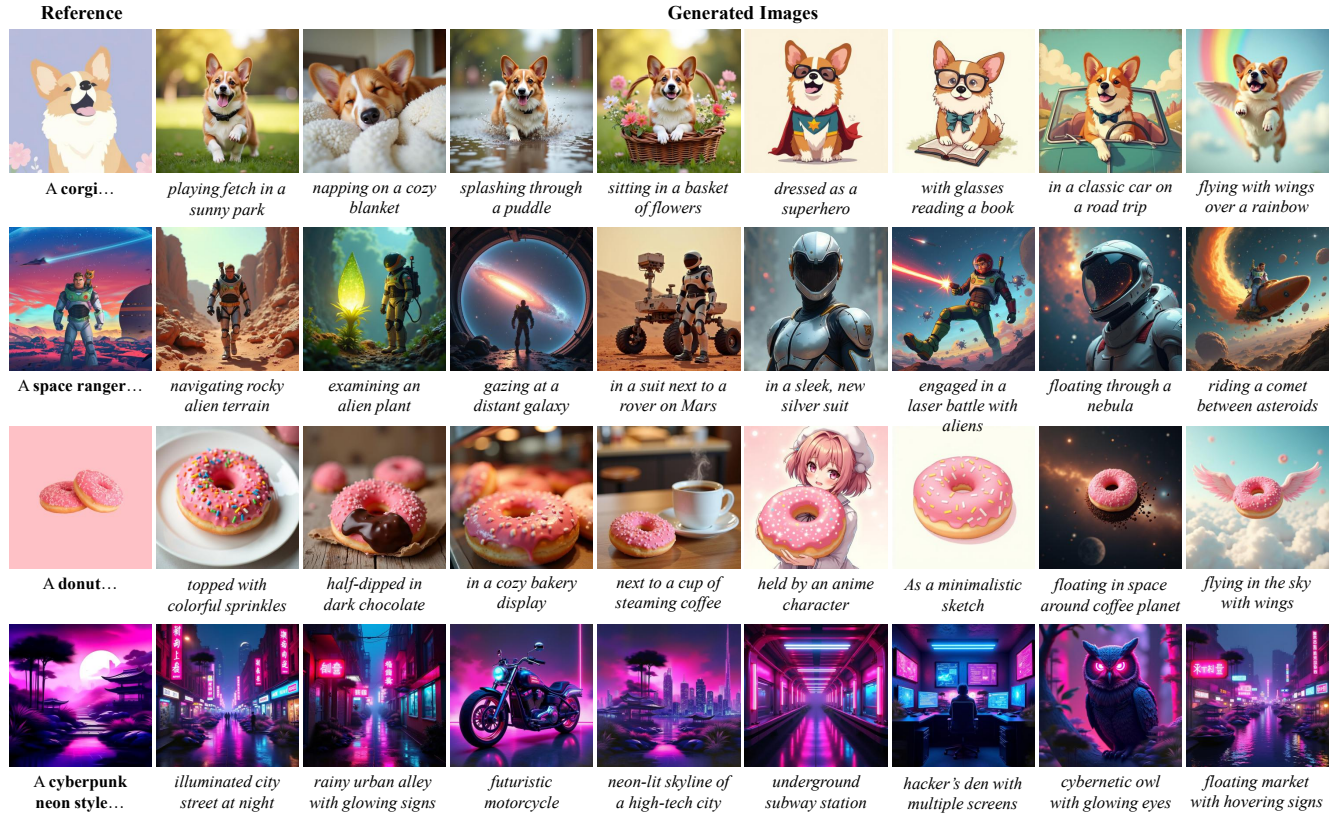

Figure 3. **Additional Qualitative Results of our models with diverse contexts and styles in Dreambench.** The generated images are in high-quality with identity preserved.

Table 1. Quantitative comparison of general single-subject personalization generation performance on DreamBench++. **Bold** represents best performance, underline represents second best.

| Method                 | CP · PF      | Concept Preservation |                |                 |                |              | Prompt Following   |                |                      |              |
|------------------------|--------------|----------------------|----------------|-----------------|----------------|--------------|--------------------|----------------|----------------------|--------------|
|                        |              | <i>Animal</i> ↑      | <i>Human</i> ↑ | <i>Object</i> ↑ | <i>Style</i> ↑ | Overall↑     | <i>Realistic</i> ↑ | <i>Style</i> ↑ | <i>Imaginative</i> ↑ | Overall↑     |
| UNO [?] ]              | 0.514        | 0.650                | 0.435          | <u>0.653</u>    | 0.325          | 0.579        | 0.947              | 0.869          | 0.792                | 0.887        |
| DreamO [?] ]           | <u>0.542</u> | <u>0.679</u>         | 0.586          | 0.621           | 0.375          | 0.601        | 0.935              | 0.910          | <u>0.821</u>         | <u>0.901</u> |
| OmniGen [?] ]          | 0.499        | 0.619                | 0.486          | 0.561           | 0.392          | 0.546        | <u>0.949</u>       | <u>0.938</u>   | 0.807                | 0.914        |
| OmniGen2 [?] ]         | 0.536        | 0.574                | 0.515          | 0.621           | 0.481          | 0.574        | <b>0.953</b>       | <b>0.948</b>   | <b>0.874</b>         | <b>0.934</b> |
| MS-Diffusion [?] ]     | <b>0.570</b> | <b>0.803</b>         | <b>0.707</b>   | <b>0.688</b>    | <u>0.614</u>   | <b>0.715</b> | 0.868              | 0.819          | 0.623                | 0.797        |
| MIP-Adapter [?] ]      | 0.375        | 0.670                | 0.599          | 0.538           | <b>0.722</b>   | 0.610        | 0.714              | 0.599          | 0.436                | 0.614        |
| XVerse [?] ]           | 0.514        | 0.687                | 0.668          | 0.568           | 0.536          | 0.613        | 0.902              | 0.802          | 0.761                | 0.838        |
| <b>UniVerse (Ours)</b> | 0.540        | 0.620                | <u>0.700</u>   | 0.610           | 0.560          | <u>0.622</u> | 0.915              | 0.825          | 0.780                | 0.855        |

to concept interference or leakage between subjects. While using more restrictive prompts (*e.g.*, “just the cat”) can partially alleviate this issue, a robust architectural solution is still necessary.

**Overfitting and Prompt Sensitivity.** Our method may occasionally overfit to a specific reference subject, leading to a decline in generalization. Furthermore, its performance degrades when exposed to vague or semantically incoherent prompts. Examples illustrating this limitation are presented in Fig. 1.

### 3.3. Future Work

There are several promising directions for extending this work and addressing the aforementioned limitations:

**Benchmark Development.** A critical immediate avenue is the construction of a large-scale, segmentation-free multi-reference benchmark. This will support more systematic evaluation and facilitate broader progress within the community.

**Disentanglement and Adaptation.** We plan to investigate developing stronger disentanglement modules or adaptive conditioning strategies to significantly reduce concept interference and improve subject separation.

**Robustness via Understanding.** Incorporating prompt-understanding or semantic-consistency models could substantially improve the system’s robustness when processing ambiguous or low-quality textual descriptions.

**Balancing Identity and Generalization.** Exploring training strategies that deliberately balance identity preservation with generalization is essential to mitigate the observed overfitting to specific references.

**Multimodal Extension.** Finally, extending the current framework to video or 3D domains offers an exciting opportunity for exploring broader multimodal applications.

## References

[41] Shuai Bai, Keqin Chen, Xuejing Liu, Jialin Wang, Wenbin Ge, Sibao Song, Kai Dang, Peng Wang, Shijie Wang, Jun

Tang, et al. Qwen2. 5-vl technical report. *arXiv preprint arXiv:2502.13923*, 2025. 1

[42] Matthew Honnibal, Ines Montani, Sofie Van Landeghem, Adriane Boyd, et al. spacy: Industrial-strength natural language processing in python. 2020. 1

[43] Black Forest Labs. Flux. <https://github.com/black-forest-labs/flux>, 2024. 1

[44] Matthias Minderer, Alexey Gritsenko, and Neil Houlsby. Scaling open-vocabulary object detection. *NeurIPS*, 2023. 1

[45] Nikhila Ravi, Valentin Gabeur, Yuan-Ting Hu, Ronghang Hu, Chaitanya Ryali, Tengyu Ma, Haitham Khedr, Roman Rädle, Chloe Rolland, Laura Gustafson, et al. Sam 2: Segment anything in images and videos. *arXiv preprint arXiv:2408.00714*, 2024. 1

[46] An Yang, Anfeng Li, Baosong Yang, Beichen Zhang, Binyuan Hui, Bo Zheng, Bowen Yu, Chang Gao, Chengen Huang, Chenxu Lv, et al. Qwen3 technical report. *arXiv preprint arXiv:2505.09388*, 2025. 1
